# Supplementary material for: Social support network of Brazilian Amazonian women to subsidise the decision-making power of planned home birth: a qualitative study
Source: HighWire-hosted journal article supplement (doi:10.1136/bmjopen-2023-080662), 2024-11-01
Supplement: bmjopen-2023-080662supp004_data_supplement.pdf [file bmjopen-2023-080662supp004_data_supplement.pdf]

**Script:**

1. Age?
2. Marital status?
3. Ethnicity?
4. Education?
5. Family income?
6. Housing?
7. Number of births?
8. Was the current pregnancy wanted?
9. Place of birth?
10. Mother's place of birth?
11. Was there a hospital transfer during your birth?

**Second stage:**

1. Tell us about the support you received for your planned home birth?
2. What was your home birth support network like?
3. Did your support network help you in your decision?
4. Tell us about this process?
5. What was it like for you to decide to have a home birth?
